# Supplementary figures and images for: Microparticles formulated from a family of novel silylated polysaccharides demonstrate inherent immunostimulatory properties and tunable hydrolytic degradability
Source: Royal Society of Chemistry journal article supplement (doi:10.1039/c6tb00745g), 2016-01-01

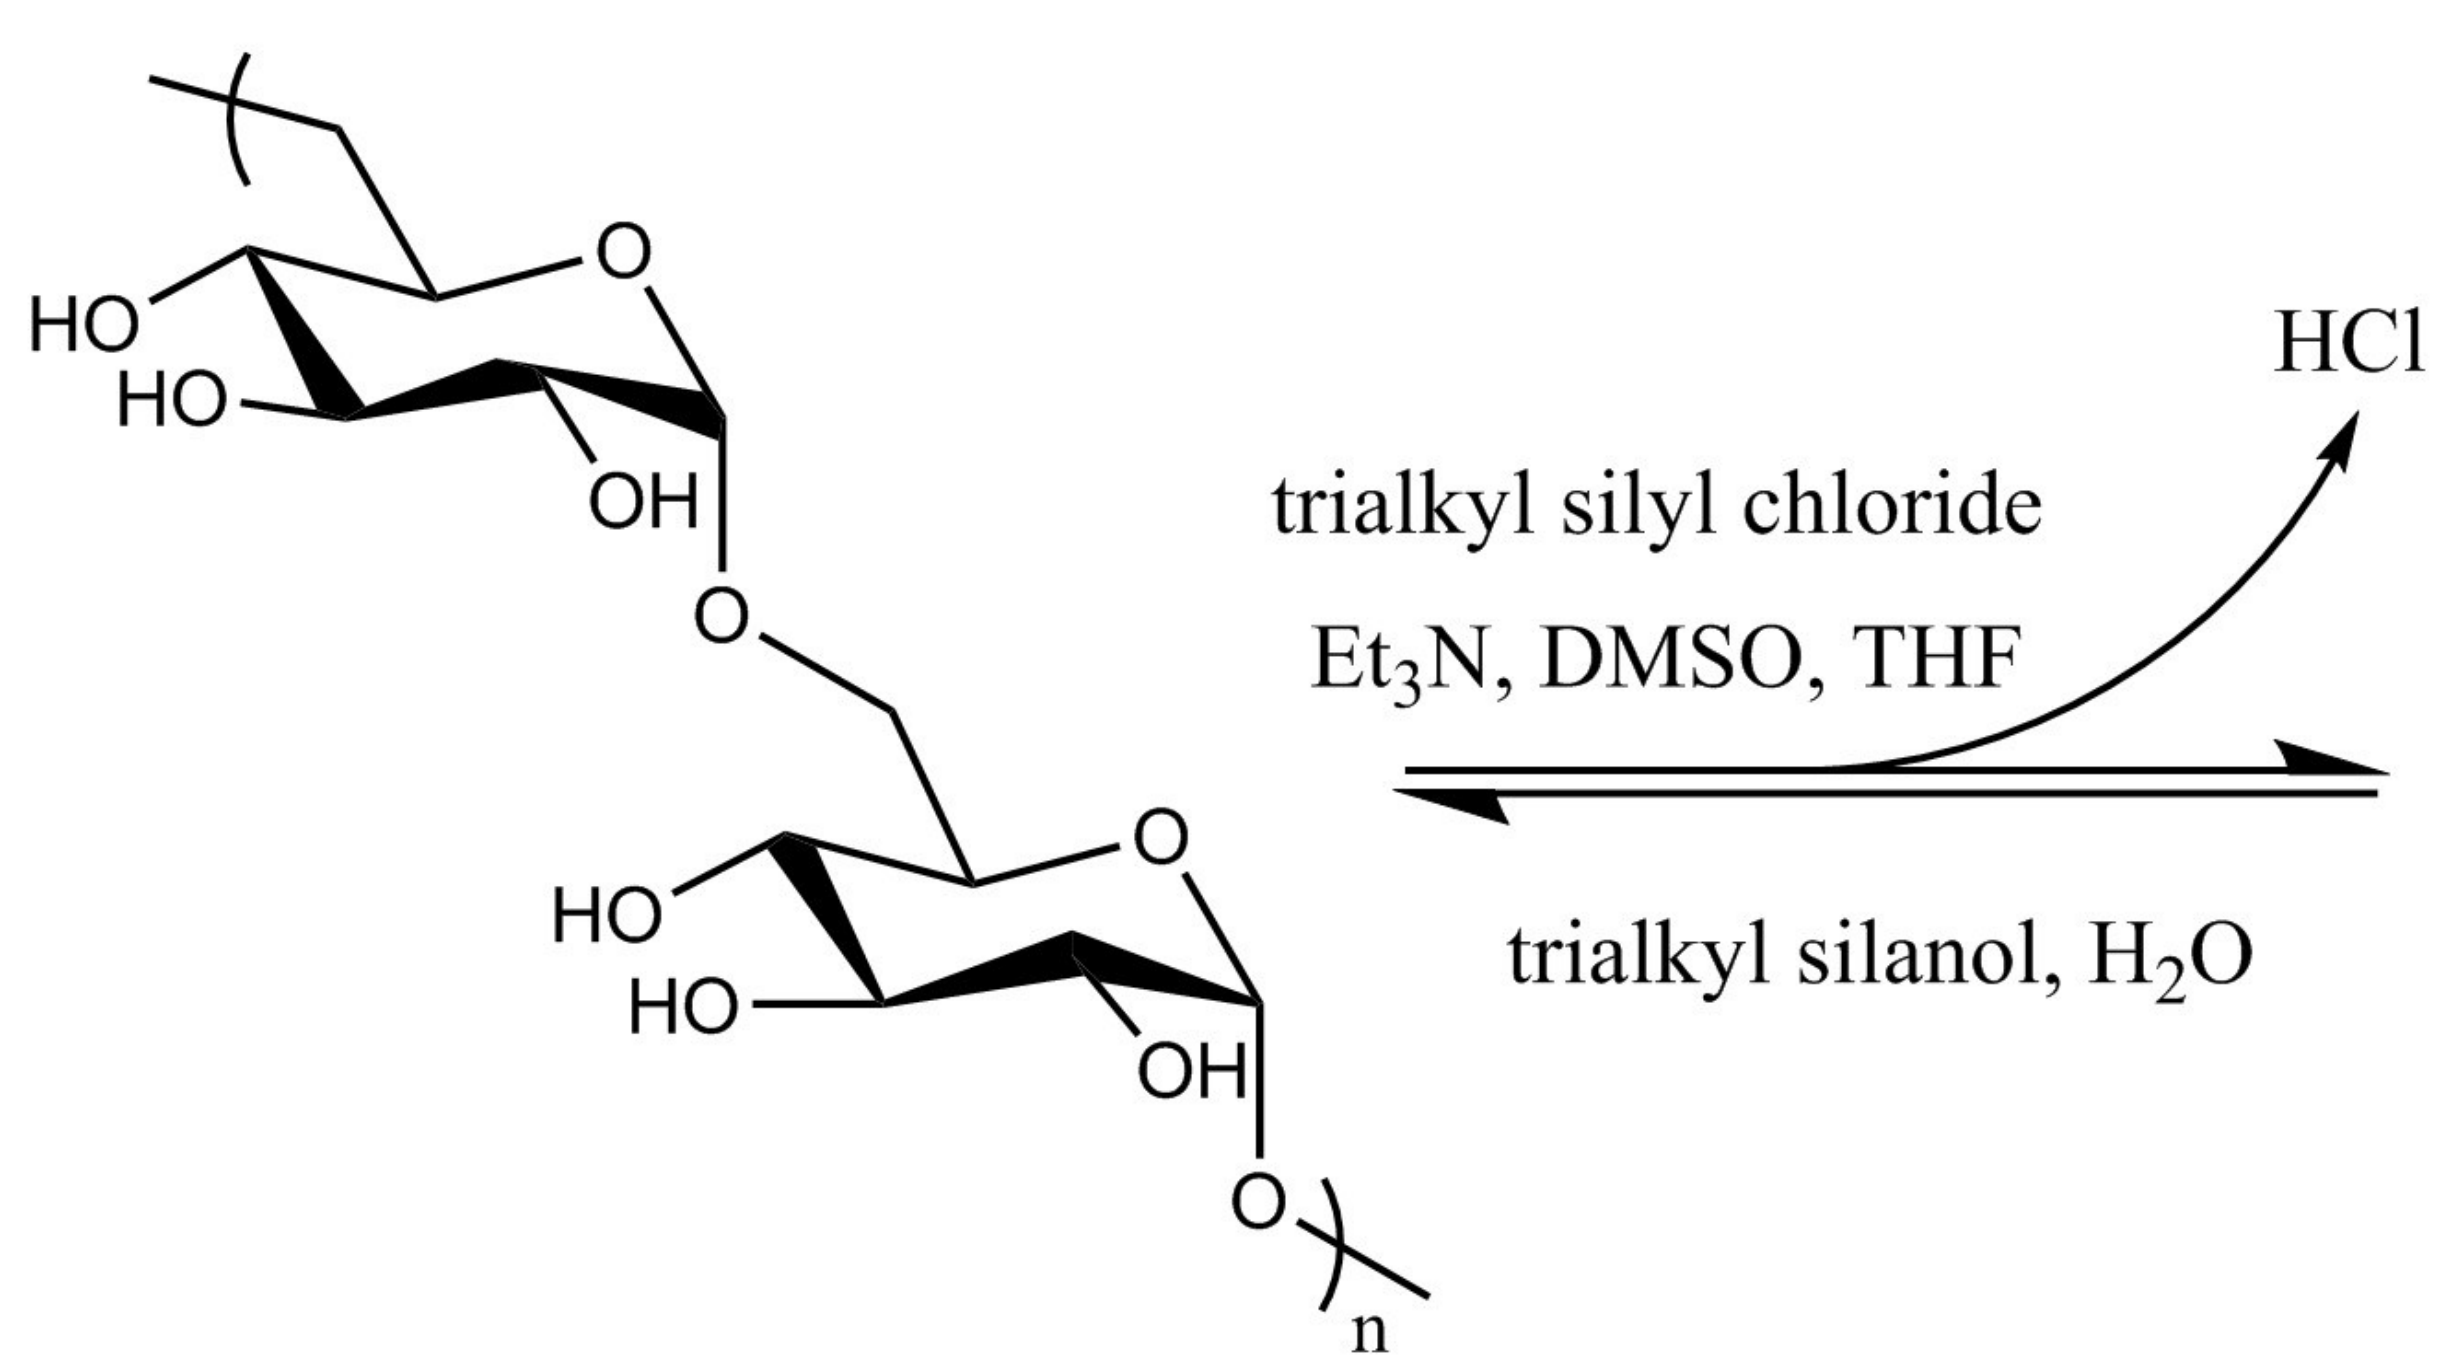

**Dextran**

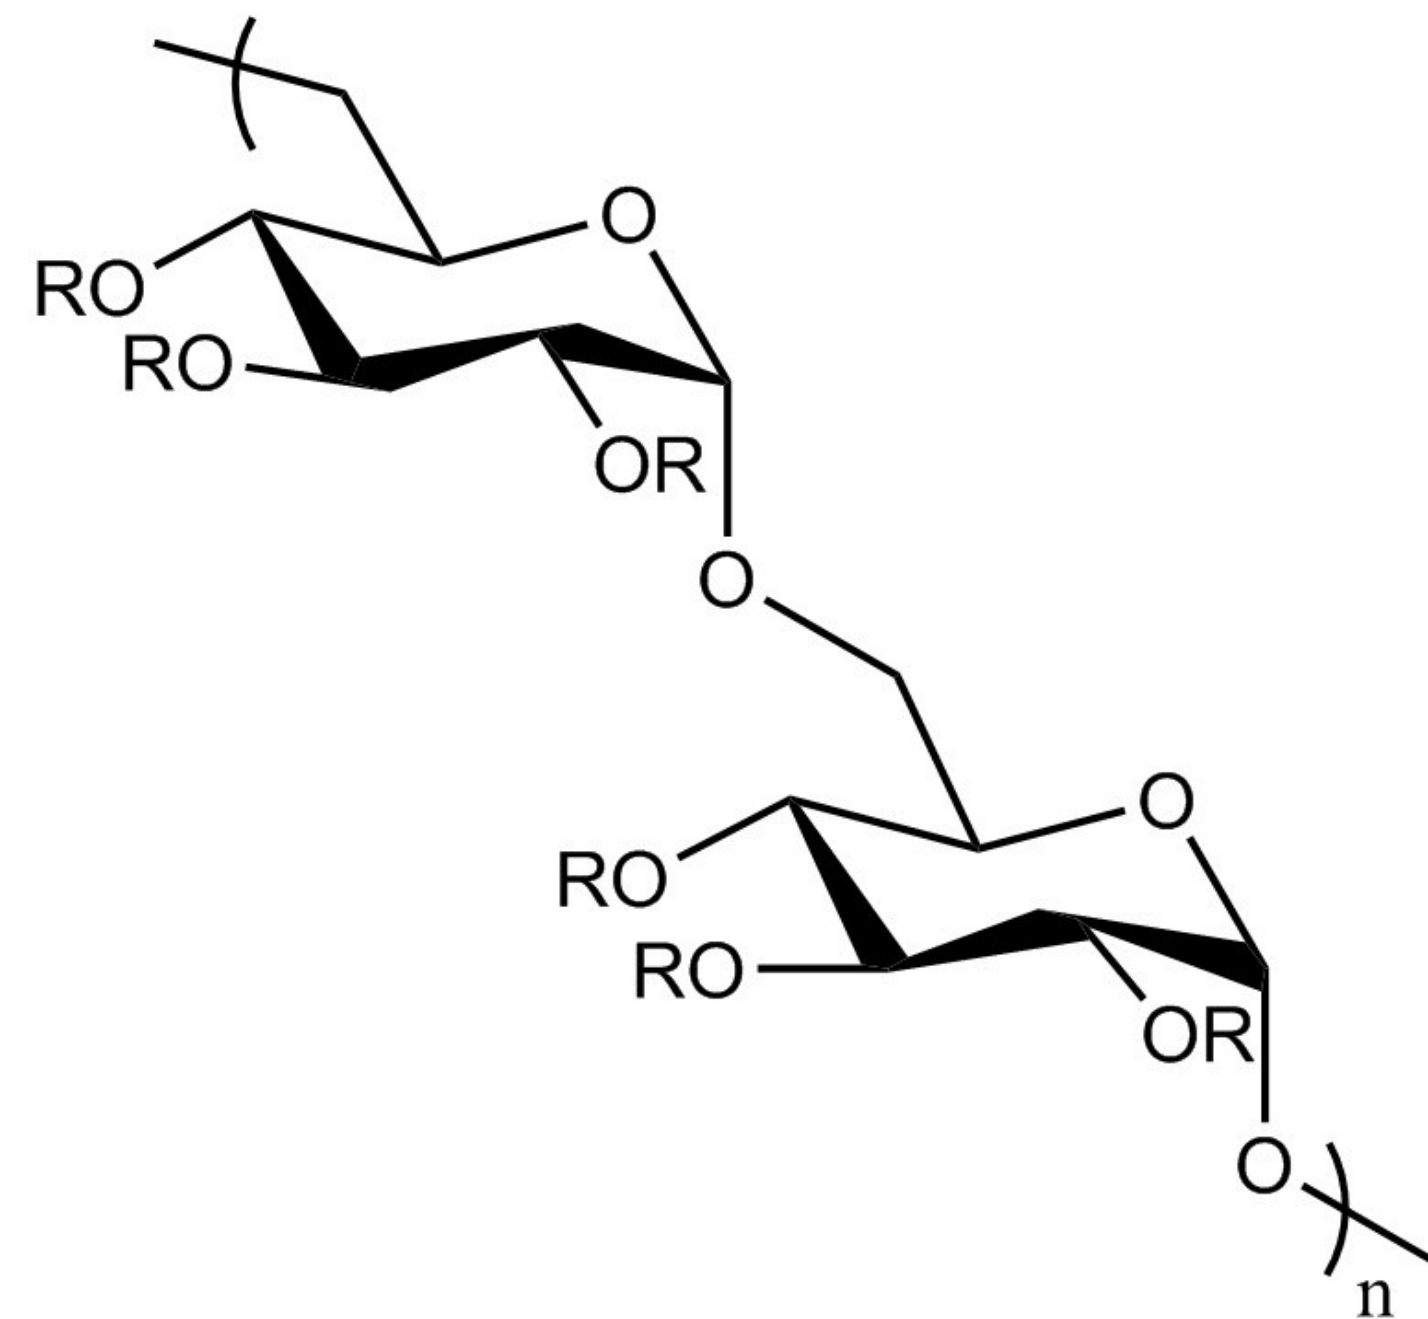

**Silylated Dextran (Silyl-DEX)**

Supplement: c6tb00745g2.pdf [file c6tb00745g2.pdf]

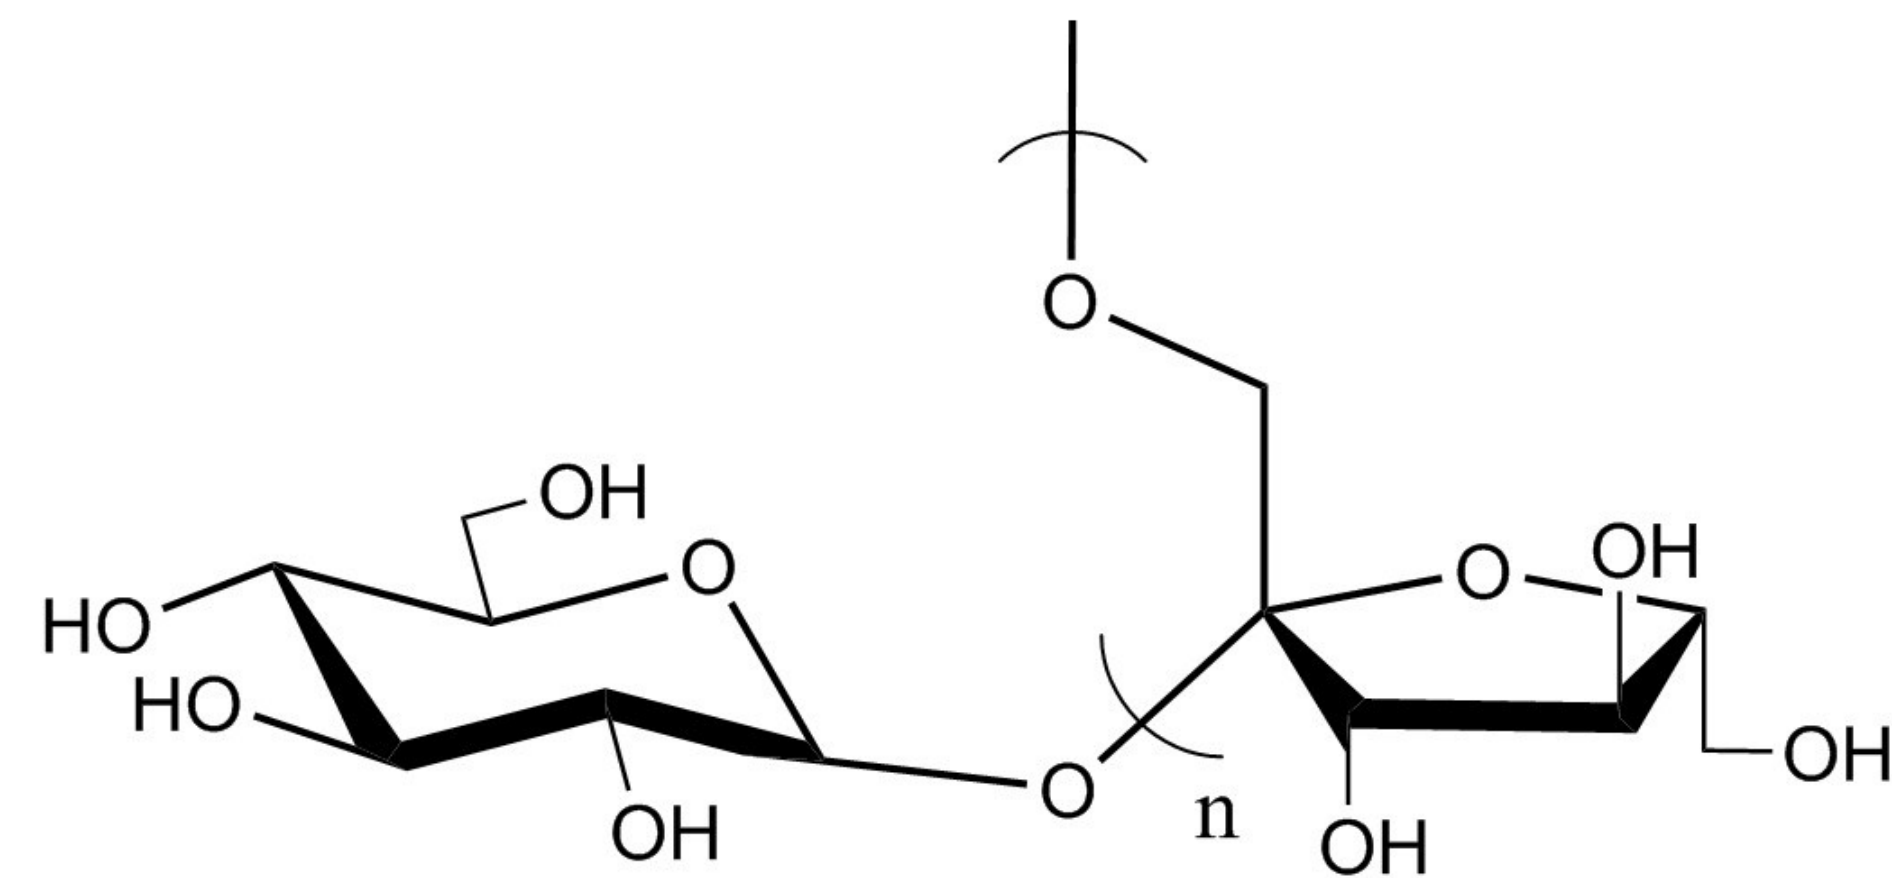

**Inulin**

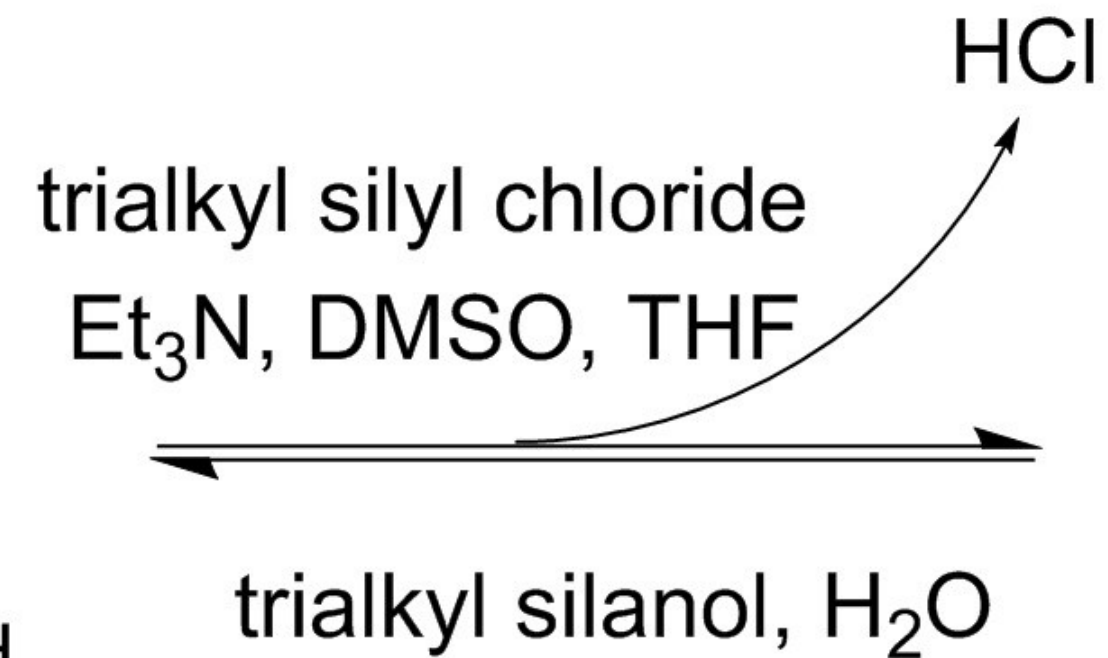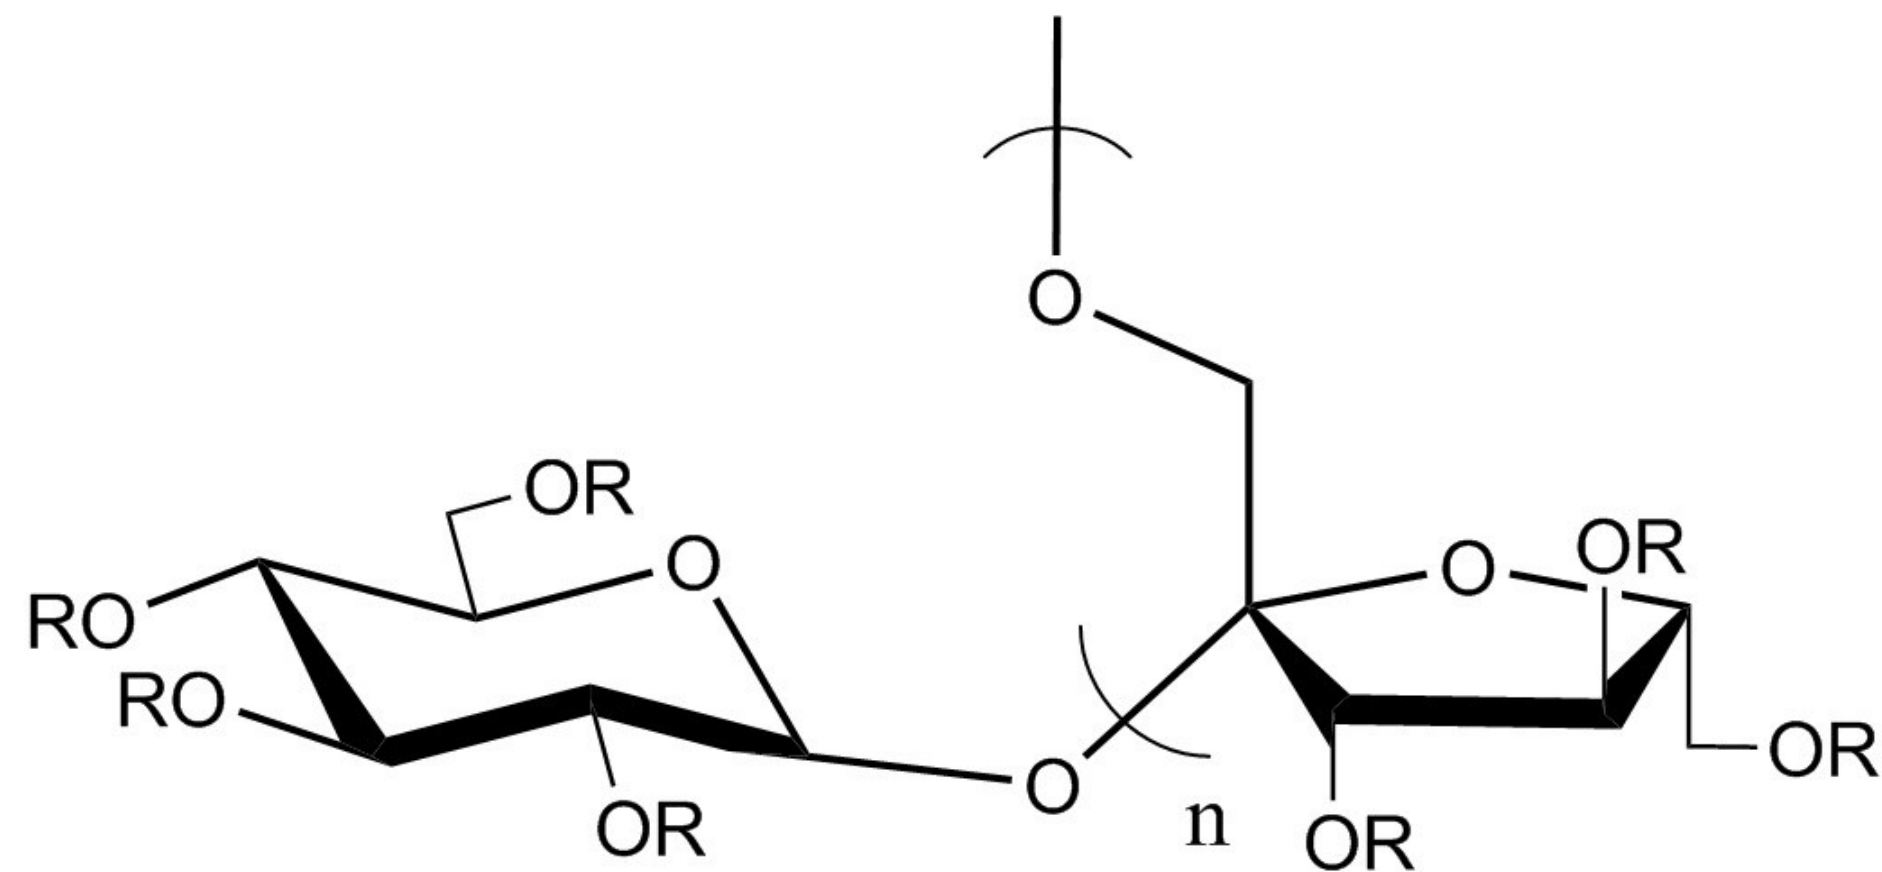

**Silylated Inulin (Silyl-IN)**

Supplement: c6tb00745g3.pdf [file c6tb00745g3.pdf]
